# Supplementary material
Source: publisher figshare collection journal article supplement (https://karger.figshare.com/articles/dataset/_/4499075)
Supplement: Supplementary file 1 [file 1]

**Table S2: List of primers used in this study**

| Gene                             | Primer sequences      | Product (bp) | GenBank Accession |
|----------------------------------|-----------------------|--------------|-------------------|
| hNK1R (sense)                    | GCTGCCCTTCCACATCTTCT  | 157          | NM_001058.3       |
| hNK1R (anti-sense)               | ACGGAACCTGTCATTGAGGC  |              |                   |
| hNK2R (sense) <sup>1</sup>       | GAGGCCGATGACGCTGTAG   | 94           | NM_001057         |
| hNK2R (anti-sense) <sup>1</sup>  | CAAGACGCTCCTCCTGTACCA |              |                   |
| hCGRPR (sense) <sup>2</sup>      | CTGCCAGGAGGC TAACTACG | 298          | NM_001308353.1    |
| hCGRPR (anti-sense) <sup>2</sup> | GACCACGATGAAGGGGTAGA  |              |                   |
| hMrgX2 (sense)                   | AAGAAGGGTGTTAAGGGGCAC | 133          | NM_054030.3       |
| hMrgX2 (anti-sense)              | CAGGGTCTCCTTGCCACAAA  |              |                   |
| h $\beta$ -Actin (sense)         | TTCCTTCCTGGGCATGGAGT  | 136          | NM_001101.3       |
| h $\beta$ -Actin (anti-sense)    | AATGCCAGGGTACATGGT GG |              |                   |

1. **Grassin-Delye S, Naline E, Buenestado A, Risse PA, Sage E, Advenier C, Devillier P.** Expression and function of human hemokinin-1 in human and guinea pig airways. *Respir Res* 2010; 11:139.
2. **Gupta S, Mehrotra S, Villalon CM, Garrelds IM, de VR, van Kats JP, Sharma HS, Saxena PR, Maassenvandenbrink A.** Characterisation of CGRP receptors in human and porcine isolated coronary arteries: evidence for CGRP receptor heterogeneity. *Eur J Pharmacol* 2006; **530**:107-16.
