# Supplementary material
Source: publisher figshare collection journal article supplement (https://karger.figshare.com/articles/dataset/_/4499075)
Supplement: Supplementary file 2 [file 1]

## Supplementary Material

**Table S1: Antibodies used in this study**

| <b>Antibody</b>                                                          | <b>Source</b>                  | <b>Dilution</b> |
|--------------------------------------------------------------------------|--------------------------------|-----------------|
| <b><i>Primary purified antibodies</i></b>                                |                                |                 |
| Rabbit polyclonal antibody PGP 9.5                                       | Abcam, UK                      | 1:200           |
| Mouse Antibody Anti-Mast Cell Tryptase [AA1]                             | Abcam, UK                      | 1:400           |
| Goat Antibody Anti-Mast Cell Chymase                                     | Abcam, UK                      | 1:100           |
| Rat Antibody Anti-Substance P [M09205]                                   | Abcam, UK                      | 1:200           |
| Rabbit Polyclonal Antibody to TACR2 / NK2R                               | Acris, Germany                 | 1:200           |
| Rabbit Antibody to RAMP1 (FL-148)<br>(For CGRP receptor)                 | Santa Cruz, USA                | 1:100           |
| Rabbit Antibody Anti-TrkA (EP1058Y)                                      | Abcam, UK                      | 1:100           |
| Mouse Antibody Anti-Human PAR2 (SAM11)                                   | eBioscience, USA               | 1:100           |
| Rabbit polyclonal MrgX2 antibody                                         | Novus Biologicals              | 1:100           |
| Rabbit anti Human Neurokinin 1 Receptors<br>(NK1R)                       | Thermo scientific, USA         | 1:500           |
| <b><i>Isotype control purified antibodies</i></b>                        |                                |                 |
| Rabbit IgG                                                               | Dianova, Germany               | 1:5000          |
| Rat IgG 2b kappa                                                         | BioLegend, USA                 | 1:200           |
| Goat IgG                                                                 | R&D systems                    | 1:300           |
| Mouse Ig                                                                 | BioLegend, USA                 | 1:200           |
| <b><i>Secondary antibodies</i></b>                                       |                                |                 |
| Alexa Fluor® 488 AffiniPure Fab Fragment<br>Donkey Anti-Rabbit IgG (H+L) | Jackson ImmunoResearch,<br>USA | 1:400           |
| Cy3 conjugated Donkey Anti-Rat IgG antibody                              | Jackson ImmunoResearch,<br>USA | 1:500           |
| Cy3 conjugated Donkey Anti-Rabbit IgG antibody                           | Jackson ImmunoResearch,<br>USA | 1:500           |
| DyLight 488 conjugated Donkey Anti-Goat IgG<br>antibody                  | Jackson<br>ImmunoResearch, USA | 1:400           |
| DyLight 649 conjugated Donkey Anti-Rabbit IgG<br>antibody                | Jackson ImmunoResearch,<br>USA | 1:400           |
| Cy3 Conjugated Donkey Anti-Goat IgG antibody                             | Jackson ImmunoResearch,<br>USA | 1:500           |
| Cy5 conjugated Donkey Anti-Rat IgG antibody                              | Jackson ImmunoResearch,<br>USA | 1:400           |
